# Supplementary material for: Effectiveness of multi-disciplinary team management on 5-year overall survival for patients with stage III lung cancer
Source: PubMed Central journal article supplement — J Thorac Dis. 2024 Aug 28;16(8):5086–96. doi: 10.21037/jtd-24-508 (PMC11388246; doi:10.21037/jtd-24-508), 2024-08-28
Supplement: jtd-16-08-5086-dss.pdf [file jtd-16-08-5086-dss.pdf]

## Data Sharing Statement

|                     |                                                                                                                                                     |                                                                                                                                                                                                  |
|---------------------|-----------------------------------------------------------------------------------------------------------------------------------------------------|--------------------------------------------------------------------------------------------------------------------------------------------------------------------------------------------------|
| <b>Article Info</b> | https://dx.doi.org/10.21037/jtd-24-508                                                                                                              |                                                                                                                                                                                                  |
| <b>Item</b>         | <b>Question</b>                                                                                                                                     | <b>Authors' Response<br/>(place "-" if not applicable)</b>                                                                                                                                       |
| 1                   | Would you like to share data collected for your study to others?                                                                                    | Yes, data will be share anonymously after a reasonable request.                                                                                                                                  |
| 2                   | If not, would you like to share the reason for your decision?                                                                                       | -                                                                                                                                                                                                |
| 3                   | What data in particular will be shared?                                                                                                             | Data regarding treatments modalities and survival.                                                                                                                                               |
| 4                   | Any other documents will be shared? Such as study protocol, statistical analysis plan, informed consent form, clinical study report, analytic code. | -                                                                                                                                                                                                |
| 5                   | When will data availability begin?                                                                                                                  | Date of publication                                                                                                                                                                              |
| 6                   | When will data availability end?                                                                                                                    | No end date.                                                                                                                                                                                     |
| 7                   | To whom will you share the data?                                                                                                                    | Medical oncologists and thoracic surgeons who are interested in the study                                                                                                                        |
| 8                   | For what type of analysis or purpose?                                                                                                               | Systematic review and meta-analysis                                                                                                                                                              |
| 9                   | How or where can the data/documents be obtained?                                                                                                    | <a href="mailto:ugo.pastorino@istitutotumori.mi.it">ugo.pastorino@istitutotumori.mi.it</a><br><a href="mailto:Camilla.valsecchi@istitutotumori.mi.it">Camilla.valsecchi@istitutotumori.mi.it</a> |
| 10                  | Any other restrictions?                                                                                                                             | -                                                                                                                                                                                                |
