# Supplementary material for: Effectiveness of multi-disciplinary team management on 5-year overall survival for patients with stage III lung cancer
Source: PubMed Central journal article supplement — J Thorac Dis. 2024 Aug 28;16(8):5086–96. doi: 10.21037/jtd-24-508 (PMC11388246; doi:10.21037/jtd-24-508), 2024-08-28
Supplement: jtd-16-08-5086-supplementary.pdf [file jtd-16-08-5086-supplementary.pdf]

**Table S1** Tumor histology for resected and non-resected stage III lung cancer

| Characteristics                      | Total      | Pre-MDT    | Post-MDT   |
|--------------------------------------|------------|------------|------------|
| Resected, n (%)                      | 670        | 299        | 371        |
| Adenocarcinoma                       | 447 (66.7) | 189 (63.2) | 258 (69.5) |
| Squamous cell carcinoma              | 144 (21.5) | 72 (24.1)  | 72 (19.4)  |
| Small cell carcinoma                 | 13 (1.9)   | 9 (3)      | 4 (1.1)    |
| Carcinoma not otherwise specified    | 15 (2.2)   | 8 (2.7)    | 7 (1.9)    |
| Undifferentiated carcinoma           | 17 (2.5)   | 10 (3.3)   | 7 (1.9)    |
| Large cell neuroendocrine carcinoma  | 19 (2.8)   | 5 (1.7)    | 14 (3.8)   |
| Large cell carcinoma                 | 7 (1)      | 3 (1)      | 4 (1.1)    |
| Sarcomatoid carcinoma                | 5 (0.7)    | 3 (1)      | 2 (0.5)    |
| Other tumor not otherwise classified | 3 (0.4)    | 0 (0)      | 3 (0.8)    |
| Non-resected, n (%)                  | 313        | 112        | 201        |
| Adenocarcinoma                       | 176 (56.2) | 52 (46.4)  | 124 (61.7) |
| Squamous cell carcinoma              | 54 (17.3)  | 22 (19.6)  | 32 (15.9)  |
| Small cell carcinoma                 | 33 (10.5)  | 17 (15.2)  | 16 (8)     |
| Carcinoma not otherwise specified    | 22 (7)     | 13 (11.6)  | 9 (4.5)    |
| Undifferentiated carcinoma           | 9 (2.9)    | 3 (2.7)    | 6 (3)      |
| Large cell neuroendocrine carcinoma  | 7 (2.2)    | 1 (0.9)    | 6 (3)      |
| Large cell carcinoma                 | 7 (2.2)    | 3 (2.7)    | 4 (2)      |
| Sarcomatoid carcinoma                | 4 (1.3)    | 1 (0.9)    | 3 (1.5)    |
| Other tumor not otherwise classified | 1 (0.3)    | 0 (0)      | 1 (0.5)    |

MDT, multidisciplinary team.

**Table S2** Detailed treatments modalities in patients with stage III lung cancer, stratified by resected and non-resected group

| Treatments modalities                                 | Total      | Pre-MDT    | Post-MDT   |
|-------------------------------------------------------|------------|------------|------------|
| Resected                                              | 670        | 299        | 371        |
| Trimodality therapy, n (%)                            | 237 (40.7) | 90 (30.1)  | 147 (39.6) |
| Chemotherapy + surgery + radiotherapy                 | 122        | 49         | 73         |
| Surgery + radiotherapy + chemotherapy                 | 98         | 30         | 68         |
| Surgery + radiotherapy + chemotherapy + immunotherapy | 1          | 0          | 1          |
| Chemotherapy + radiotherapy + surgery                 | 11         | 6          | 5          |
| Chemotherapy + radiotherapy + surgery + chemotherapy  | 1          | 1          | 0          |
| Chemotherapy + surgery + chemotherapy + radiotherapy  | 4          | 4          | 0          |
| Surgery + systemic therapy, n (%)                     | 234 (34.9) | 103 (34.4) | 131 (35.3) |
| Induction chemotherapy                                | 122        | 57         | 65         |
| Adjuvant chemotherapy                                 | 102        | 40         | 62         |
| Induction chemotherapy + target therapy               | 3          | 1          | 2          |
| Surgery + target therapy                              | 1          | 0          | 1          |
| Pre and post chemotherapy                             | 5          | 5          | 0          |
| Surgery + radiotherapy + target therapy               | 1          | 0          | 1          |
| Surgery +/- radiotherapy, n (%)                       | 199 (29.7) | 106 (35.5) | 93 (25.1)  |
| Radiotherapy + surgery                                | 1          | 1          | 0          |
| Surgery + radiotherapy                                | 25         | 11         | 14         |
| Surgery                                               | 173        | 94         | 79         |
| Non-resected                                          | 313        | 112        | 201        |
| Chemoradiotherapy, n (%)                              | 101 (26.2) | 23 (14.7)  | 78 (34.1)  |
| Chemoradiotherapy                                     | 74         | 23         | 51         |
| Chemoradiotherapy + immunotherapy                     | 18         | 0          | 18         |
| Chemoradiotherapy + target therapy                    | 8          | 0          | 8          |
| Chemoradiotherapy + immunotherapy + target therapy    | 1          | 0          | 1          |
| Systemic therapy, n (%)                               | 132 (34.3) | 54 (34.6)  | 78 (34.1)  |
| Chemotherapy                                          | 103        | 54         | 49         |
| Chemotherapy + immunotherapy                          | 13         | 0          | 13         |
| Chemotherapy + target therapy                         | 5          | 0          | 5          |
| Radiotherapy + immunotherapy                          | 1          | 0          | 1          |
| Radiotherapy + target therapy                         | 1          | 0          | 1          |
| Target therapy                                        | 4          | 0          | 4          |
| Immunotherapy                                         | 5          | 0          | 5          |
| No chemotherapy, n (%)                                | 80 (20.8)  | 35 (22.4)  | 45 (19.7)  |
| Radiotherapy                                          | 14         | 5          | 9          |
| No therapy                                            | 66         | 30         | 36         |

MDT, multidisciplinary team.

**Table S3** Patient and clinical characteristics in matched cohorts

| Characteristics                      | Total, N=891 | Pre-MDT propensity score matching, N=319 | Post-MDT, N=572 | P       |
|--------------------------------------|--------------|------------------------------------------|-----------------|---------|
| <b>Patient's characteristics</b>     |              |                                          |                 |         |
| Age at the diagnosis (years), n (%)  |              |                                          |                 |         |
| <55                                  | 120 (13.5)   | 56 (17.6)                                | 64 (11.2)       | 0.0086  |
| 55-74                                | 621 (69.7)   | 220 (69)                                 | 401 (70.1)      |         |
| ≥75                                  | 150 (16.8)   | 43 (13.5)                                | 107 (18.7)      |         |
| Sex, n (%)                           |              |                                          |                 |         |
| Female                               | 339 (38)     | 113 (35.4)                               | 226 (39.5)      | 0.2283  |
| Male                                 | 552 (62)     | 206 (64.6)                               | 346 (60.5)      |         |
| Smoking status, n (%) <sup>a</sup>   |              |                                          |                 |         |
| Current smoker                       | 555 (62.3)   | 266 (83.4)                               | 289 (50.5)      | <0.0001 |
| Ex-smoker                            | 222 (24.9)   | 3 (0.9)                                  | 219 (38.3)      |         |
| Never smoke                          | 107 (12)     | 46 (14.4)                                | 61 (10.7)       |         |
| <b>Tumor characteristics</b>         |              |                                          |                 |         |
| Histology type, n (%)                |              |                                          |                 |         |
| Adenocarcinoma                       | 583 (65.4)   | 201 (63)                                 | 382 (66.8)      | 0.4184  |
| Squamous cell carcinoma              | 168 (18.9)   | 64 (20.1)                                | 104 (18.2)      |         |
| Large cell neuroendocrine carcinoma  | 39 (4.4)     | 11 (3.4)                                 | 28 (4.9)        |         |
| Small cell lung cancer (SCLC)        | 36 (4)       | 16 (5)                                   | 20 (3.5)        |         |
| Other tumor not otherwise classified | 65 (7.3)     | 27 (8.5)                                 | 38 (6.6)        |         |
| Stage TNM 8th edition, n (%)         |              |                                          |                 |         |
| IIIA                                 | 660 (74.1)   | 234 (73.4)                               | 426 (74.5)      | 0.8387  |
| IIIB                                 | 218 (24.5)   | 81 (25.4)                                | 137 (24)        |         |
| IIIC                                 | 13 (1.5)     | 4 (1.3)                                  | 9 (1.6)         |         |
| <b>Therapeutic approach</b>          |              |                                          |                 |         |
| Surgery, n (%)                       |              |                                          |                 |         |
| Yes                                  | 602 (67.6)   | 231 (72.4)                               | 371 (64.9)      | 0.0209  |
| No                                   | 289 (32.4)   | 88 (27.6)                                | 201 (35.1)      |         |
| Resected only                        | 602          | 231                                      | 371             |         |
| Type of surgical procedure, n (%)    |              |                                          |                 |         |
| Pneumonectomy                        | 104 (11.7)   | 48 (15)                                  | 56 (15.1)       | 0.1281  |
| Lobectomy                            | 443 (49.7)   | 166 (52)                                 | 277 (74.7)      |         |
| Sublobar                             | 55 (6.2)     | 17 (5.3)                                 | 38 (10.2)       |         |
| Treatment modalities, n (%)          |              |                                          |                 |         |
| Trimodality therapy                  | 217 (24.4)   | 70 (21.9)                                | 147 (39.6)      | 0.0076  |
| Surgery + systemic therapy           | 208 (23.3)   | 77 (24.1)                                | 131 (35.3)      |         |
| Surgery +/- RT                       | 177 (19.9)   | 84 (26.3)                                | 93 (25.1)       |         |
| Non-resected only                    | 289          | 88                                       | 201             |         |
| Treatment modalities, n (%)          |              |                                          |                 |         |
| Chemoradiotherapy                    | 93 (10.4)    | 15 (4.7)                                 | 78 (38.8)       | 0.0013  |
| Systemic therapy                     | 123 (13.8)   | 45 (14.1)                                | 78 (38.8)       |         |
| No chemotherapy                      | 73 (8.2)     | 28 (8.8)                                 | 45 (22.4)       |         |

<sup>a</sup>, 7 missing data. MDT, multidisciplinary team; TNM, tumour nodes metastasis; RT, radiotherapy.

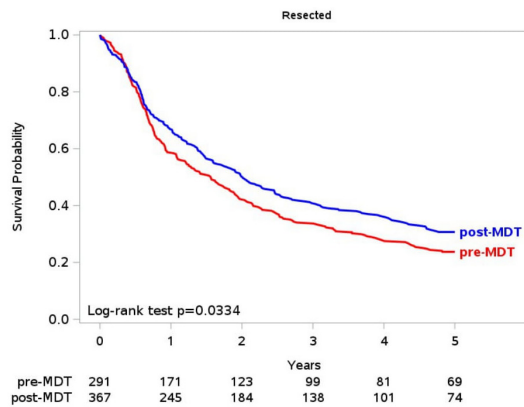

**Figure S1** Five-year disease-free survival in resected stage III lung cancer patients. MDT, multidisciplinary team.

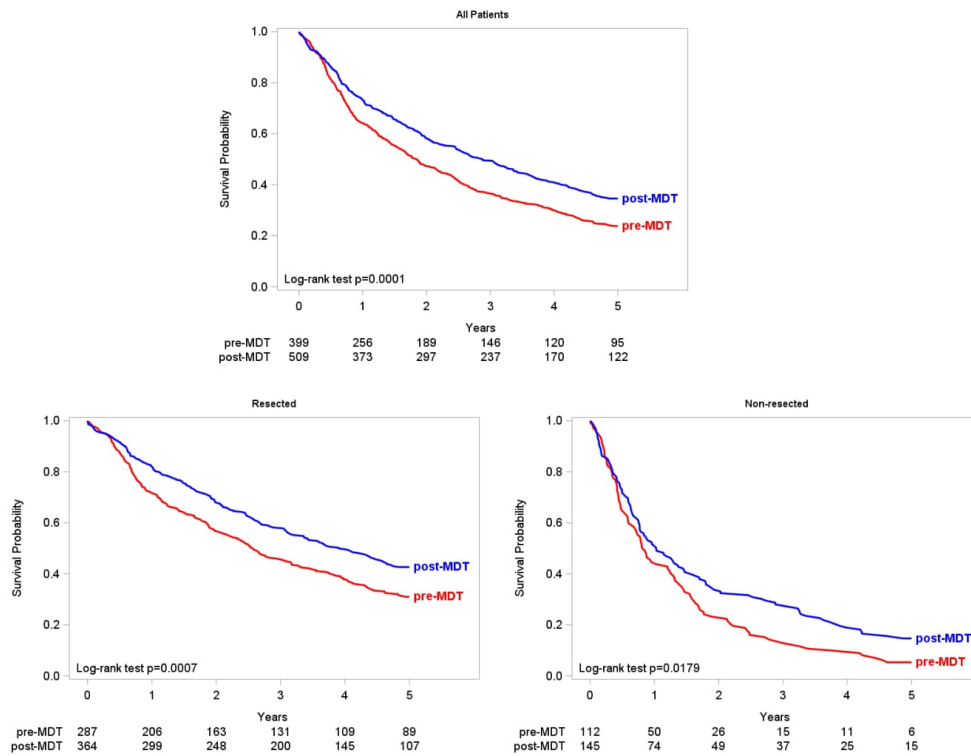

**Figure S2** Five-year overall survival (OS) in stage III lung cancer stratified in a selected cohort. For resected patients we considered only patients treated with: CT + S + RT; CT + RT + S; S + RT + CT; CT + S; S + CT; S + RT; S. For non-resected patients we considered only patients treated with: CT; CT + RT; no therapy; RT. MDT, multidisciplinary team; CT, chemotherapy; S, surgery; RT, radiotherapy.

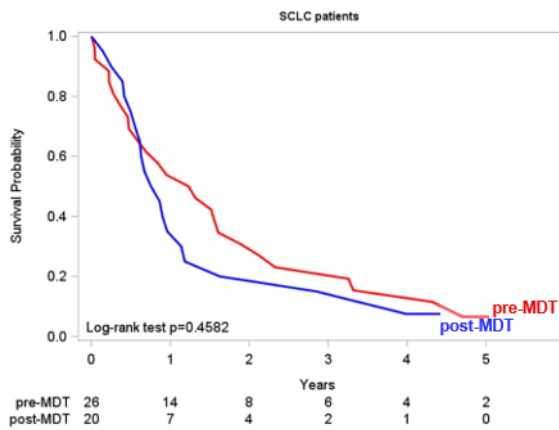

**Figure S3** Five-year overall survival (OS) between small-cell lung cancer (SCLC) patients diagnosed in the two study periods. MDT, multidisciplinary team.

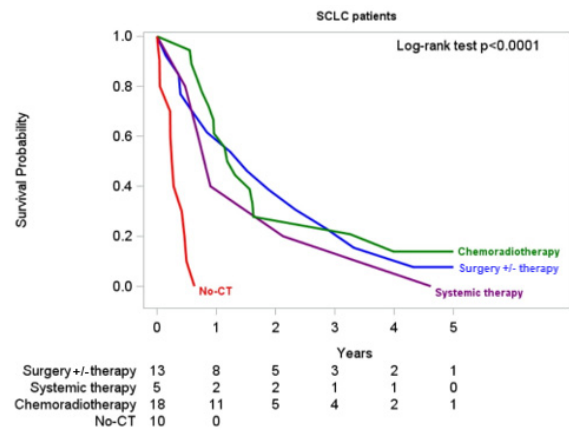

**Figure S4** Five-year overall survival (OS) in patients with small-cell lung cancer (SCLC) stratified by treatments. CT, chemotherapy
